# Supplementary material for: Morphological alterations of cultured human colorectal matched tumour and healthy organoids
Source: PubMed Central journal article supplement (PMC5828197; doi:10.18632/oncotarget.24279), 2018-01-19
Supplement: oncotarget-09-10572-s001.pdf [file oncotarget-09-10572-s001.pdf]

## Morphological alterations of cultured human colorectal matched tumour and healthy organoids

### SUPPLEMENTARY MATERIALS

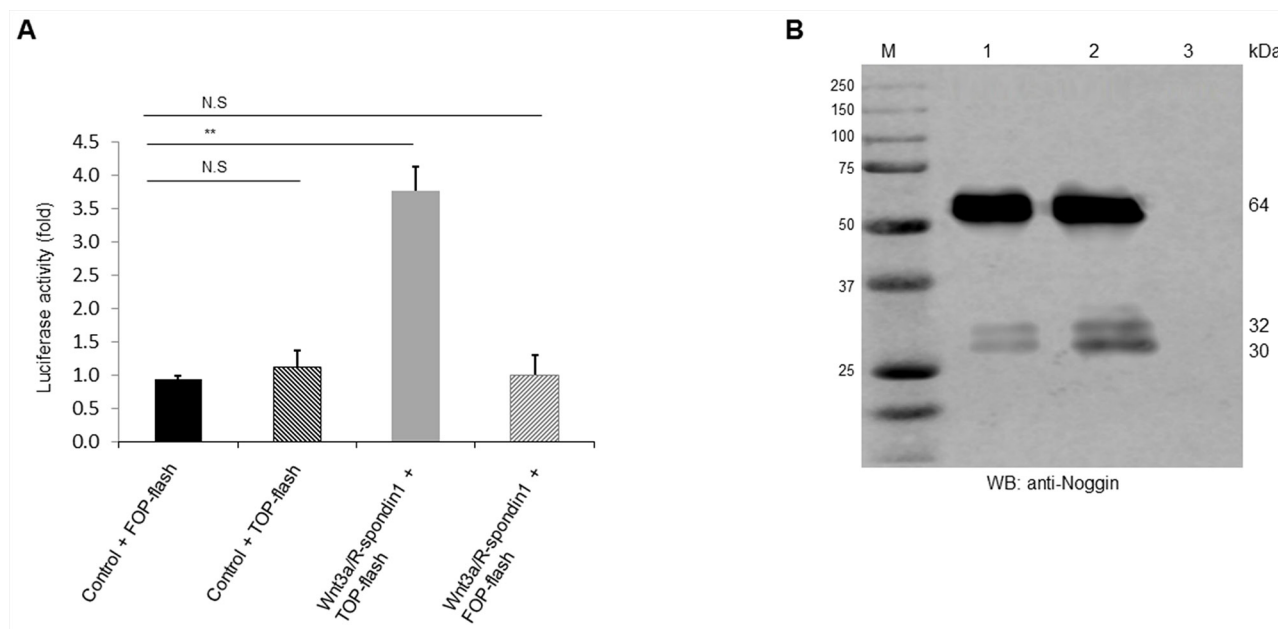

**Supplementary Figure 1: (A)** Luciferase reporter assay in HEK293T cells confirmed the Wnt-3A +R-Spondin function. The R-Spondin 1, as a Wnt agonist, induced the Wnt-3A activity. The luciferase activity was significantly increased in combination treatment of Wnt-3A +R-Spondin 1  $**P < 0.01$ . **(B)** Western blotting analysis of the secreted Noggin protein in HEK293 cells. The WB analysis of collected secreted Noggin protein revealed two bands with different sizes; monomer; 32kD and dimer, 64kD. Lane 1; represents the untransfected HEK293 cells, while lane 2; is a previously validated functional Noggin protein used as a positive control. Lane 3 shows cells transfected with Noggin plasmid.

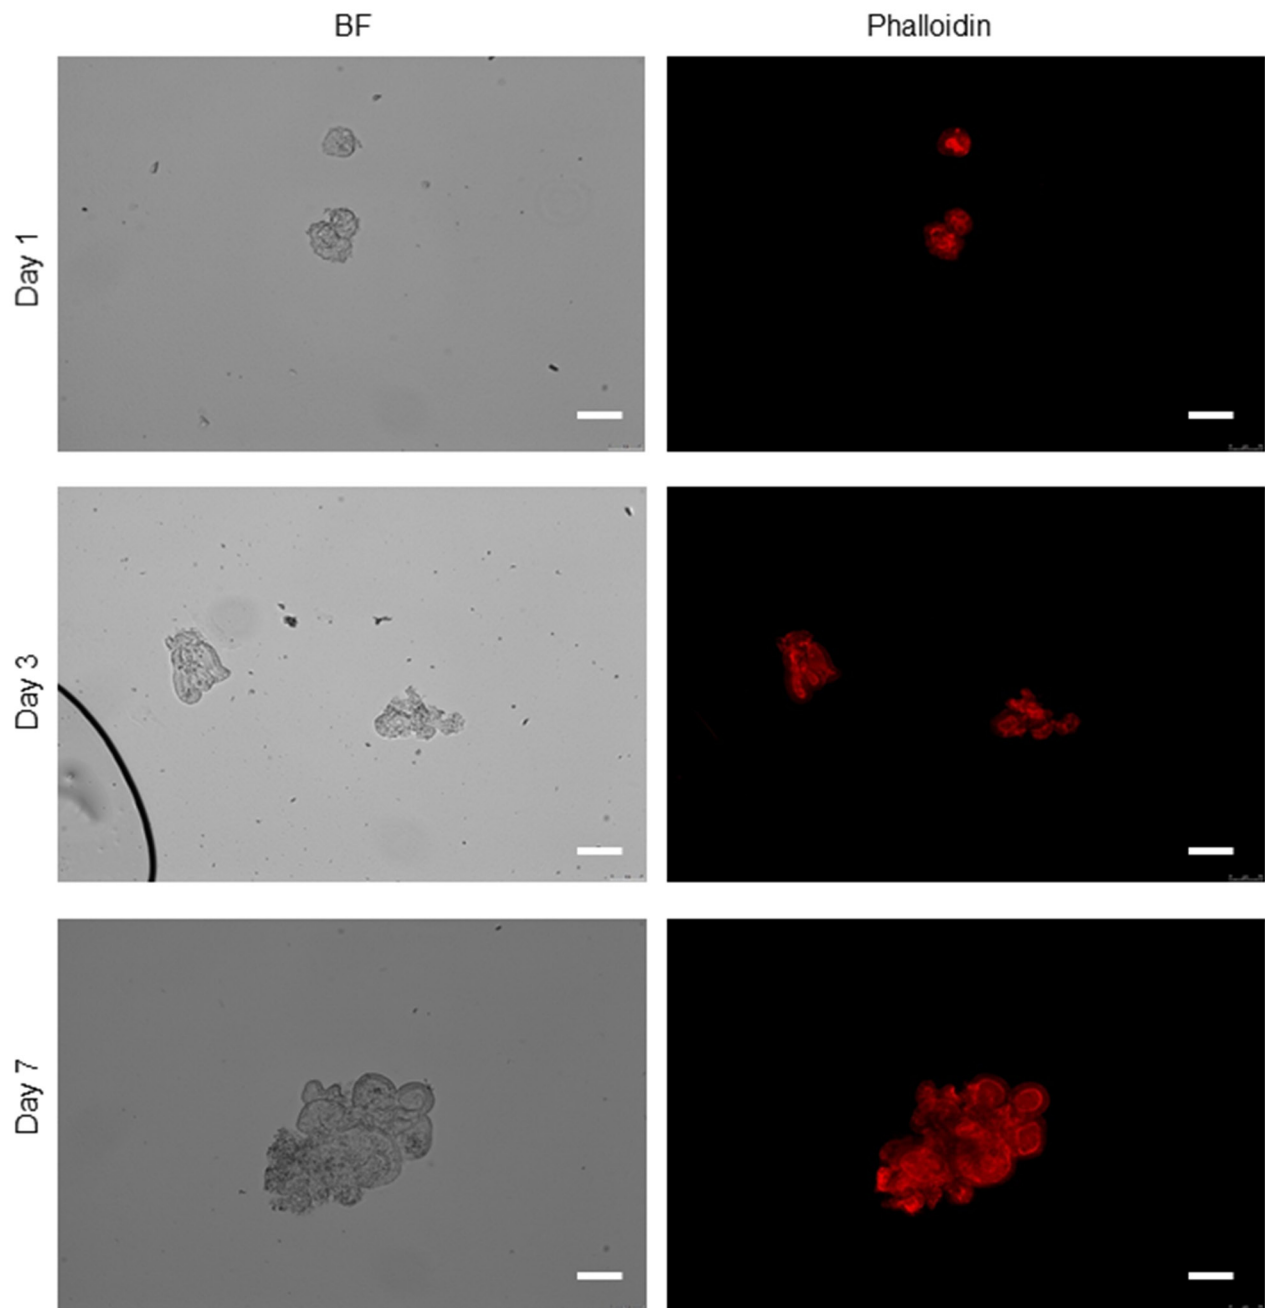

**Supplementary Figure 2: Visualization of organoids morphology using either bright-field (BF) or fluorescent Phalloidin staining in single representative organoids.** Scale bars, 100 µm.

**Supplementary Table 1: The clinicopathological characteristics presentation of enrolled patients in the current study.**

See Supplementary File 1
